# Supplementary material
Source: publisher site journal article supplement (https://www.dovepress.com/article/234523)
Supplement: Supplementary file 1 [file get_supplementary_file.php]

**Supplementary Tables**

**Table S1**. **Cox univariate analysis, correlation of level of distress with overall survival for the study cohort (n=404).**

P value for the correlation is 0.001, with a higher risk of death at higher levels of distress.

| **Level of distress** | **N (%)** | **Hazard Ratio (95% CI) for survival** |
| --- | --- | --- |
| 0 | 60 (14.9) | Reference |
| 1 | 69 (17.1) | 0.63 (0.33-1.21) |
| 2 | 56 (13.9) | 0.88 (0.45-1.72) |
| 3 | 50 (12.4) | 0.40 (0.17-0.95) |
| 4 | 58 (14.4) | 1.50 (0.84-2.70) |
| 5 | 111 (27.5) | 1.45 (0.85-2.47) |

**Table S2**. **Cox univariate analysis, correlation of level of pain score with overall survival for the study cohort (n=404).**

Pain relates to visual analog score for pain with analgesics. P value for the correlation is 0.004, with a general trend of a higher risk of death at higher pain scores.

| **Pain** | **n (%)** | **Hazard Ratio (95% CI) for survival** |
| --- | --- | --- |
| 0 | 203 (50.2) | Reference |
| 1 | 18 (4.5) | 1.08 (0.43-2.71) |
| 2 | 51 (12.6) | 1.37 (0.81-2.33) |
| 3 | 34 (8.4) | 1.87 (1.05-3.32) |
| 4 | 21 (5.2) | 1.99 (1.01-3.93) |
| 5 | 24 (5.9) | 2.47 (1.34-4.56) |
| 6 | 14 (3.5) | 0.86 (0.27-2.75) |
| 7 | 14 (3.5) | 2.67 (1.31-5.42) |
| 8 | 16 (4.0) | 1.71 (0.68-4.3) |
| 9 | 1 (0.2) | 16.15 (2.18-119.5) |
| 10 | 8 (2.0) | 3.35 (1.21-9.3) |
